# Supplementary material for: Marek’s Disease Virus Infection of Natural Killer Cells
Source: PubMed Central journal article supplement (PMC6956363; doi:10.3390/microorganisms7120588), 2019-11-20
Supplement: microorganisms-07-00588-s001.pdf [file microorganisms-07-00588-s001.pdf]

## Supplementary Material

### Marek's Disease Virus Infection of Natural Killer Cells

Luca D. Bertzbach, Daphne A. van Haarlem, Sonja Härtle, Benedikt B. Kaufer and Christine A. Jansen

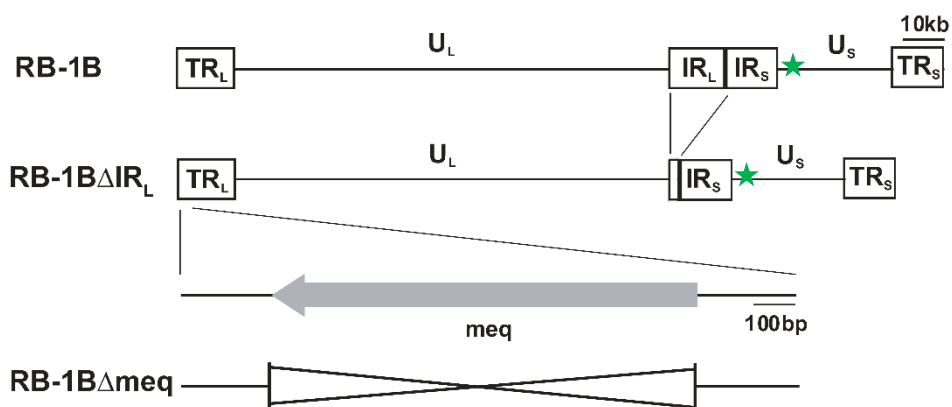

**Figure S1.** Generation of recombinant viruses. Schematic representation of the Marek's disease virus (MDV) genome with two unique regions, unique long ( $U_L$ ) and short ( $U_S$ ) that are flanked by terminal ( $TR_L$  and  $TR_S$ ) and internal ( $IR_L$  and  $IR_S$ ) inverted repeat regions. The focus is on the  $TR_L$  region that contains *meq*. The green asterisks indicate the location of the minimal fertility factor replicon (mini-F) in the  $U_S$  region.

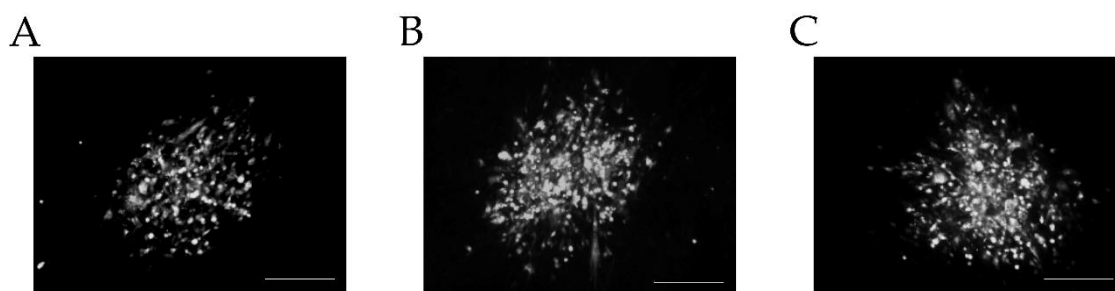

**Figure S2.** Representative plaque images. Plaque images from (A) RB-1B-infected CEC, (B) CVI-infected CEC and (C) RB-1B $\Delta$ meq-infected CEC. The scale bar corresponds to 100 $\mu$ M.

**Table S1.** Primers and TaqMan probes used in this study.

| <b>Construct</b>                                       | <b>Sequence 5' – 3'</b>                                                                   |
|--------------------------------------------------------|-------------------------------------------------------------------------------------------|
| ep <sup>1</sup> PCR forward primer<br>(eGFP insertion) | GGTGACACGCGCGGCCTCGAACACAGCTGCAGGCCATGGTGA<br>GCAAGGGCGAGG                                |
| ep PCR reverse primer<br>(eGFP insertion)              | CGTCGACCCGGGTACCTCTAGATCCGCTAGCGCTTTA<br>CTTGTACAGCTCGTCCATGCC                            |
| ep PCR forward primer<br>( <i>Δmeq</i> )               | CAGGGTCTCCCGTCACCTGGAAACCACCAGACCGTAGACTGGG<br>GGGACGGATCGTCAGCGGTAGGGATAACAGGGTAATCGATTT |
| ep PCR reverse primer<br>( <i>Δmeq</i> )               | GGGCGCTATGCCCTACAGTCCCGCTGACGATCCGTCCCCCA<br>GTCTACGGTCTGGTGGGCCAGTGTTACAACCAATTAACC      |
| <b>qPCR</b>                                            |                                                                                           |
| ICP4 forward primer                                    | CGTGTTTTCCGGCATGTG                                                                        |
| ICP4 reverse primer                                    | TCCCATACCAATCCTCATCCA                                                                     |
| ICP4 probe                                             | FAM-CCCCCACCAGGTGCAGGCA-TAM                                                               |
| iNOS forward primer                                    | GAGTGGTTTAAGGAGTTGGATCTGA                                                                 |
| iNOS reverse primer                                    | TTCCAGACCTCCACCTCAA                                                                       |
| iNOS probe                                             | FAM-CTCTGCCTGCTGTTGCCAACATGC-TAM                                                          |

<sup>1</sup>*en passant* mutagenesis.

FAM = 6-carboxyfluorescein; TAM = tetramethylrhodamine (TAMRA).
